# Supplementary material for: Stratification of hypertensive COVID-19 patients by quantitative NMR spectroscopy of serum metabolites, lipoproteins and inflammation markers
Source: bioRxiv or medRxiv preprint supplement (doi:10.1101/2022.12.20.22283729), 2022-12-21
Supplement: Supplementary file [file media-1.pdf]

Supplementary data

**Stratification of hypertensive COVID-19 patients by quantitative  
NMR spectroscopy of serum metabolites, lipoproteins and  
inflammation markers**

Supplementary results:

Baseline characteristics (S1 Table):

Clinical metadata:

| Characteristics   | Total             | Female          | Male            |
|-------------------|-------------------|-----------------|-----------------|
| Gender, no. (%)   | 329               | 174 (52,9)      | 155 (47,1)      |
| Age, median (IQR) | 54 (44- 64)       | 52 (41- 63)     | 58 (48- 65)     |
| BMI, median (IQR) | 27.9 (24.4- 32.2) | 26.7 (22.6- 32) | 29 (25.9- 32.3) |

| Disease severity               | Total     | Female    | Male      |
|--------------------------------|-----------|-----------|-----------|
| Hospital total, no. (%)        | 71 (22.8) | 25 (35.2) | 46 (64.8) |
| Duration of stay, median (IQR) | 6 (3-8)   | 4 (3-7)   | 6 (4-8)   |
| Oxygen demand, no. (%)         | 48 (67.6) | 15 (31.2) | 33 (68.8) |
| ICU, no. (%)                   | 8 (11.3)  | 3 (37.5)  | 5 (62.5)  |
| Death, no. (%)                 | 5 (1.5)   | 3 (60.0)  | 2 (40.0)  |

Pre-existing diseases and medication:

| Pre-existing disorders | Total (%)  | Female (%) | Male (%)  |
|------------------------|------------|------------|-----------|
| AHT                    | 134 (40.7) | 63 (47.0)  | 71 (53.0) |
| CAD                    | 33 (10.0)  | 9 (27.3)   | 24 (72.7) |
| Chronic heart failure  | 6 (1.8)    | 4 (66.7)   | 2 (33.3)  |
| D.M.                   | 44 (13.4)  | 20 (45.5)  | 24 (54.5) |
| Asthma                 | 44 (13.4)  | 31 (70.5)  | 13 (29.5) |
| COPD                   | 12 (3.6)   | 4 (33.3)   | 8 (66.7)  |
| OSAS                   | 22 (6.7)   | 7 (31.8)   | 15 (68.2) |
| Depression             | 23 (7.0)   | 15 (65.2)  | 8 (34.8)  |
| Cancer                 | 15 (4.6)   | 7 (46.7)   | 8 (53.3)  |
| Cancer in past         | 23 (7.0)   | 14 (60.9)  | 9 (39.1)  |
| Stroke in the past     | 16 (4.9)   | 8 (50.0)   | 8 (50.0)  |
| Rheumatoid Arthritis   | 10 (3.0)   | 9 (90.0)   | 1 (10.0)  |
| Hypothyroidism         | 46 (14.0)  | 35 (76.1)  | 11 (23.9) |

|                                   |          |           |           |
|-----------------------------------|----------|-----------|-----------|
| Inflammatory bowel disease        | 6 (1.8)  | 5 (83.3)  | 1 (16.7)  |
| Thrombosis in the past            | 27 (8.2) | 16 (59.3) | 11 (40.7) |
| Organ transplantation in the past | 3 (0.9)  | 0 (0)     | 3 (100)   |
| Vaccination                       | 6 (1.8)  | 4 (66.7)  | 2 (33.3)  |
| Pregnancy                         | 4 (1.2)  | 4 (100)   | 0 (0)     |
| AF                                | 12 (3.6) | 6 (50.0)  | 6 (50.0)  |

| <b>Medication</b>        | <b>Total (%)</b> | <b>Female (%)</b> | <b>Male (%)</b> |
|--------------------------|------------------|-------------------|-----------------|
| Beta-blockers            | 61 (18.5)        | 31 (50.8)         | 30 (49.2)       |
| Calcium channel blockers | 32 (9.7)         | 14 (43.8)         | 18 (56.3)       |
| ACE- Inhibitors          | 43 (13.1)        | 17 (39.5)         | 26 (60.5)       |
| AT1-R-blockers           | 62 (18.8)        | 34 (54.8)         | 28 (45.2)       |
| L-thyroxin               | 41 (12.5)        | 31 (75.6)         | 10 (24.4)       |
| ASS                      | 46 (14.0)        | 18 (31.9)         | 28 (60.9)       |
| Clopidogrel              | 5 (1.5)          | 0 (0)             | 5 (100)         |
| Citalopram/Sertraline    | 13 (4.0)         | 7 (53.8)          | 6 (46.2)        |
| Mirtazapine              | 3 (0.9)          | 2 (66.7)          | 1 (33.3)        |
| Venlafaxine              | 2 (0.6)          | 2 (100)           | 0 (0)           |
| Opipramol/ Amitriptyline | 5 (1.5)          | 4 (80.0)          | 1 (20.0)        |
| Pantoprazole             | 40 (12.2)        | 21 (52.5)         | 19 (47.5)       |
| Statine                  | 46 (14.0)        | 13 (28.3)         | 33 (71.7)       |
| Metformin                | 20 (6.1)         | 7 (35.0)          | 13 (65.0)       |
| Allopurinol              | 14 (4.3)         | 1 (7.1)           | 13 (92.9)       |
| Insulin                  | 9 (2.7)          | 3 (33.3)          | 6 (66.7)        |
| Oral antidiabetics       | 10 (3.0)         | 1 (10.0)          | 9 (90.0)        |
| NOAC                     | 17 (5.2)         | 5 (29.4)          | 12 (70.6)       |
| Cortisone                | 7 (2.1)          | 5 (71.4)          | 2 (28.6)        |
| Adalimumab               | 2 (0.6)          | 0 (0)             | 2 (100)         |
| Azathioprine             | 1 (0.3)          | 1 (100)           | 0 (0)           |
| Tacrolimus               | 3 (0.9)          | 3 (100)           | 0 (0)           |
| Rituximab                | 1 (0.3)          | 0 (0)             | 1 (100)         |
| Methotrexate             | 5 (1.5)          | 4 (80.0)          | 1 (20.0)        |
| Spray                    | 29 (8.8)         | 16 (55.2)         | 13 (44.8)       |

Analysis COVID-19 vs. Healthy Control

Univariate Analysis Table (sorted by p-value) (S2 Table)

| Parameter   | FC      | log2(FC) | p.adjusted | -log10(p) |
|-------------|---------|----------|------------|-----------|
| Glutamine   | 0.6841  | -0.54772 | 1.03E-111  | 110.99    |
| TPA2        | 0.72538 | -0.46319 | 2.41E-94   | 93.619    |
| HDA2        | 0.75719 | -0.40128 | 1.01E-87   | 86.997    |
| TPA1        | 0.75174 | -0.4117  | 1.25E-83   | 82.902    |
| Citric acid | 0.62126 | -0.68673 | 9.49E-79   | 78.023    |
| Lysine      | 0.65143 | -0.61831 | 6.31E-76   | 75.2      |
| HDA1        | 0.76073 | -0.39455 | 2.87E-73   | 72.542    |
| H3CH        | 0.69877 | -0.51711 | 1.25E-70   | 69.903    |
| HDPL        | 0.73918 | -0.43599 | 2.41E-66   | 65.618    |
| HDCH        | 0.71989 | -0.47415 | 1.06E-64   | 63.976    |
| H4PL        | 0.73369 | -0.44676 | 3.85E-64   | 63.414    |
| H3PL        | 0.73583 | -0.44255 | 1.50E-61   | 60.823    |
| H4A1        | 0.76592 | -0.38474 | 1.28E-57   | 56.893    |
| H4A2        | 0.72183 | -0.47026 | 1.43E-51   | 50.846    |
| TPCH        | 0.76278 | -0.39065 | 6.51E-51   | 50.187    |
| H4CH        | 0.70392 | -0.50651 | 6.67E-51   | 50.176    |
| H3A1        | 0.77994 | -0.35857 | 6.17E-49   | 48.21     |
| H2A1        | 0.74449 | -0.42567 | 1.81E-48   | 47.743    |
| H3A2        | 0.74249 | -0.42955 | 1.22E-45   | 44.912    |
| H3FC        | 0.65433 | -0.61191 | 1.86E-37   | 36.73     |
| H2CH        | 0.70586 | -0.50255 | 9.65E-37   | 36.016    |
| LDPL        | 0.76539 | -0.38574 | 2.91E-36   | 35.535    |
| H2A2        | 0.70813 | -0.49791 | 2.81E-34   | 33.551    |
| LDCH        | 0.72038 | -0.47318 | 1.54E-33   | 32.812    |
| V5FC        | 1.5719  | 0.65249  | 2.62E-33   | 32.581    |
| V1TG        | 1.716   | 0.77907  | 2.52E-32   | 31.598    |
| V2FC        | 1.5272  | 0.6109   | 5.97E-31   | 30.224    |
| H2FC        | 0.67684 | -0.56312 | 1.14E-29   | 28.943    |
| V1CH        | 1.5871  | 0.6664   | 2.43E-28   | 27.614    |
| VLPN        | 1.3416  | 0.42398  | 8.23E-28   | 27.085    |
| VLAB        | 1.3416  | 0.42397  | 8.23E-28   | 27.085    |
| V5TG        | 1.2223  | 0.28965  | 2.34E-27   | 26.63     |
| L1FC        | 0.75605 | -0.40345 | 2.52E-27   | 26.598    |
| H1FC        | 0.66575 | -0.58695 | 3.20E-27   | 26.494    |
| H4FC        | 0.7114  | -0.49127 | 1.22E-26   | 25.913    |
| H2PL        | 0.75959 | -0.39671 | 2.32E-26   | 25.635    |
| L1CH        | 0.75049 | -0.41409 | 2.75E-26   | 25.56     |
| L4PL        | 0.65059 | -0.62017 | 2.19E-25   | 24.659    |
| V2TG        | 1.4587  | 0.54466  | 4.45E-25   | 24.352    |
| Histidine   | 0.74462 | -0.42542 | 7.27E-25   | 24.138    |
| Leucine     | 0.80476 | -0.31336 | 1.78E-24   | 23.749    |
| TPTG        | 1.368   | 0.45202  | 7.09E-24   | 23.15     |
| VLTG        | 1.4276  | 0.51356  | 9.27E-24   | 23.033    |
| LDFC        | 0.80783 | -0.30787 | 3.29E-23   | 22.483    |

|                        |         |          |            |        |
|------------------------|---------|----------|------------|--------|
| Dimethylsulfone        | 1.3473  | 0.43009  | 2.53E-22   | 21.597 |
| L4CH                   | 0.64172 | -0.63999 | 7.55E-22   | 21.122 |
| VLFC                   | 1.2819  | 0.3583   | 2.43E-20   | 19.614 |
| L4FC                   | 0.70237 | -0.50969 | 2.52E-20   | 19.598 |
| L1TG                   | 1.3178  | 0.39817  | 1.34E-18   | 17.873 |
| H1CH                   | 0.70565 | -0.50298 | 1.64E-18   | 17.784 |
| L4AB                   | 0.68527 | -0.54526 | 1.73E-18   | 17.763 |
| L3CH                   | 0.66506 | -0.58845 | 3.34E-18   | 17.476 |
| HDFC                   | 0.82447 | -0.27846 | 3.92E-18   | 17.407 |
| V3TG                   | 1.3283  | 0.40955  | 3.93E-18   | 17.405 |
| L1PL                   | 0.81302 | -0.29864 | 7.64E-18   | 17.117 |
| L5CH                   | 0.70177 | -0.51092 | 9.27E-18   | 17.033 |
| L3PL                   | 0.71021 | -0.49368 | 1.71E-17   | 16.767 |
| V1PL                   | 1.4874  | 0.57278  | 3.09E-17   | 16.51  |
| L4PN                   | 0.69663 | -0.52153 | 3.11E-17   | 16.507 |
| H1A2                   | 0.66862 | -0.58074 | 8.87E-17   | 16.052 |
| Isoleucine             | 0.82895 | -0.27064 | 1.07E-16   | 15.969 |
| VLPL                   | 1.2479  | 0.31956  | 1.38E-16   | 15.859 |
| H1PL                   | 0.72123 | -0.47146 | 2.22E-16   | 15.653 |
| V2CH                   | 1.2642  | 0.33818  | 5.44E-16   | 15.265 |
| ABA1                   | 1.2089  | 0.27374  | 5.46E-16   | 15.263 |
| V3FC                   | 1.292   | 0.36957  | 1.65E-15   | 14.782 |
| L5FC                   | 0.75664 | -0.40233 | 3.26E-15   | 14.486 |
| L5PL                   | 0.72952 | -0.45499 | 2.15E-14   | 13.667 |
| V2PL                   | 1.2718  | 0.34689  | 3.49E-14   | 13.457 |
| VLCH                   | 1.2022  | 0.26572  | 7.09E-13   | 12.149 |
| L5PN                   | 0.76034 | -0.39529 | 7.64E-13   | 12.117 |
| Phenylalanine          | 1.2936  | 0.37136  | 1.96E-12   | 11.707 |
| L6FC                   | 0.81138 | -0.30155 | 1.96E-12   | 11.707 |
| IDPL                   | 0.7708  | -0.37557 | 2.86E-12   | 11.543 |
| L5AB                   | 0.76712 | -0.38248 | 2.93E-12   | 11.533 |
| Trimethylamine-N-oxide | 0.64414 | -0.63456 | 1.23E-11   | 10.911 |
| L3FC                   | 0.78187 | -0.355   | 1.23E-11   | 10.911 |
| IDTG                   | 1.507   | 0.59166  | 5.26E-11   | 10.279 |
| L3AB                   | 0.78125 | -0.35614 | 2.16E-10   | 9.6655 |
| Acetone                | 1.7595  | 0.8152   | 2.20E-10   | 9.6586 |
| L3PN                   | 0.78201 | -0.35474 | 2.47E-10   | 9.6067 |
| H1A1                   | 0.73887 | -0.4366  | 2.80E-10   | 9.5529 |
| Ornithine              | 0.79665 | -0.32799 | 3.01E-10   | 9.5218 |
| IDFC                   | 0.81631 | -0.29282 | 2.32E-05   | 4.634  |
| V1FC                   | 1.3128  | 0.3926   | 2.76E-05   | 4.5593 |
| N-Dimethylglycine      | 2.3684  | 1.2439   | 6.50E-05   | 4.1873 |
| Glutamic acid          | 1.2456  | 0.31688  | 0.00022808 | 3.6419 |
| 3-Hydroxybutyric acid  | 1.3828  | 0.46758  | 0.00078785 | 3.1036 |
| Succinic acid          | 1.2426  | 0.31342  | 0.03106    | 1.5078 |

## Multivariate Analysis: COVID-19 vs. Healthy Control (S3)

### PCA

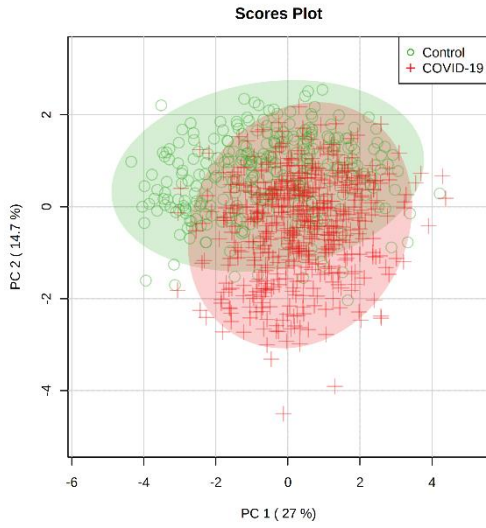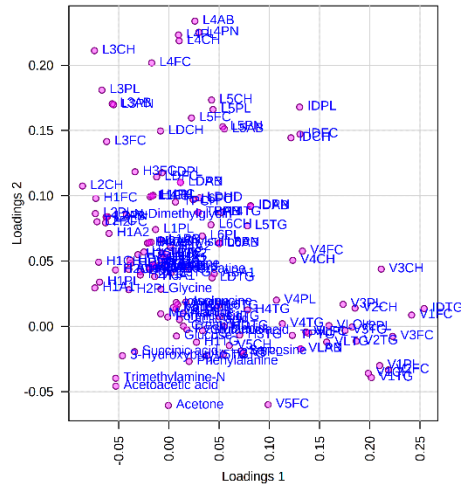

### OPLS-DA

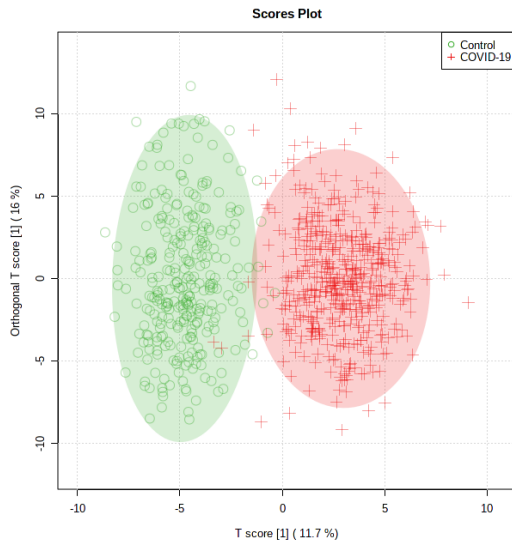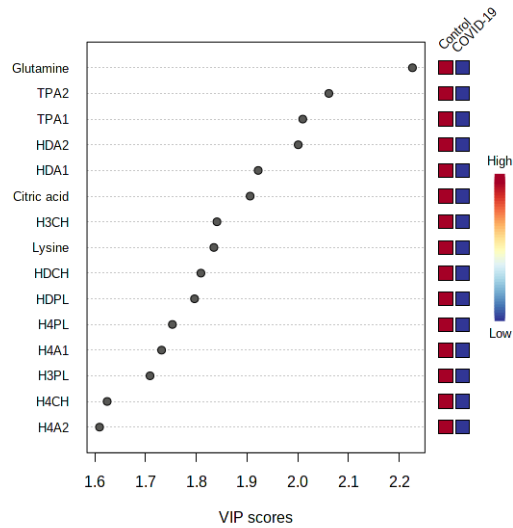

### Analysis AHT vs. AHT + COVID-19

#### Univariate Analysis (sorted by p-value) (S4 Table)

| Parameter    | FC      | log2(FC) | p.adjusted | -log10(p) |
|--------------|---------|----------|------------|-----------|
| Pyruvic acid | 0.34378 | -1.5404  | 3.42E-37   | 36.466    |
| CRP          | 4.4144  | 2.1422   | 3.46E-32   | 31.461    |
| Lysine       | 0.63898 | -0.64615 | 1.57E-22   | 21.803    |
| Glutamine    | 0.75166 | -0.41185 | 3.22E-17   | 16.492    |
| H4A1         | 0.76258 | -0.39103 | 9.19E-14   | 13.037    |
| H4PL         | 0.75366 | -0.40802 | 1.20E-13   | 12.922    |
| Alanine      | 0.7504  | -0.41426 | 1.27E-13   | 12.895    |
| TPA1         | 0.81603 | -0.29331 | 2.47E-12   | 11.607    |
| Formic acid  | 0.47993 | -1.0591  | 3.02E-12   | 11.519    |
| SPC          | 0.76124 | -0.39358 | 1.33E-11   | 10.876    |

|               |         |          |            |        |
|---------------|---------|----------|------------|--------|
| H4A2          | 0.73651 | -0.44123 | 3.52E-11   | 10.454 |
| Citric acid   | 0.69175 | -0.53167 | 4.14E-11   | 10.383 |
| HDA1          | 0.82541 | -0.27681 | 8.26E-11   | 10.083 |
| Isoleucine    | 0.66558 | -0.58731 | 2.03E-10   | 9.6925 |
| Leuk          | 0.6963  | -0.52223 | 2.03E-10   | 9.6925 |
| TPA2          | 0.82631 | -0.27525 | 2.38E-10   | 9.6233 |
| Glyc/SPC      | 1.4792  | 0.56478  | 4.70E-10   | 9.3278 |
| TPCH          | 0.7705  | -0.37614 | 1.03E-09   | 8.9851 |
| H4CH          | 0.71471 | -0.48458 | 1.36E-09   | 8.8666 |
| HDCH          | 0.80149 | -0.31925 | 1.36E-09   | 8.8666 |
| L6CH          | 0.7126  | -0.48884 | 3.25E-06   | 5.4875 |
| IDPL          | 0.57773 | -0.79154 | 6.32E-06   | 5.199  |
| L6PL          | 0.72773 | -0.45852 | 1.09E-05   | 4.962  |
| L5CH          | 0.63683 | -0.65103 | 1.23E-05   | 4.909  |
| Leucine       | 0.79357 | -0.33357 | 1.23E-05   | 4.909  |
| L6PN          | 0.72834 | -0.45732 | 1.78E-05   | 4.7492 |
| L6AB          | 0.73137 | -0.45133 | 2.22E-05   | 4.6532 |
| L6FC          | 0.69577 | -0.52332 | 2.44E-05   | 4.6127 |
| Glutamic acid | 1.5094  | 0.59398  | 3.65E-05   | 4.4382 |
| Methionine    | 0.76587 | -0.38482 | 5.96E-05   | 4.225  |
| L5PL          | 0.67758 | -0.56154 | 7.55E-05   | 4.122  |
| Tyrosine      | 0.78906 | -0.34179 | 0.00019964 | 3.6998 |
| Sarcosine     | 0.60361 | -0.7283  | 0.00029499 | 3.5302 |
| L5FC          | 0.7072  | -0.49982 | 0.00034    | 3.4685 |
| H1CH          | 0.78061 | -0.35733 | 0.00043452 | 3.362  |
| H4FC          | 0.7629  | -0.39043 | 0.00053694 | 3.2701 |
| IDTG          | 0.58286 | -0.77878 | 0.00054617 | 3.2627 |
| LDCH          | 0.75058 | -0.41393 | 0.00062519 | 3.204  |
| Histidine     | 0.80503 | -0.31289 | 0.00069957 | 3.1552 |
| LDPL          | 0.80256 | -0.31732 | 0.00082554 | 3.0833 |
| V1FC          | 0.61237 | -0.70751 | 0.0010861  | 2.9641 |
| H3FC          | 0.76657 | -0.38352 | 0.0010861  | 2.9641 |
| L4CH          | 0.64315 | -0.63677 | 0.0013149  | 2.8811 |
| V1TG          | 0.68941 | -0.53657 | 0.0018967  | 2.722  |
| L4PN          | 0.6905  | -0.53429 | 0.0025942  | 2.586  |
| L4FC          | 0.71626 | -0.48144 | 0.0025942  | 2.586  |
| L4AB          | 0.68751 | -0.54056 | 0.0027858  | 2.5551 |
| V1PL          | 0.67093 | -0.57576 | 0.0040313  | 2.3946 |
| LDPN          | 0.82261 | -0.28172 | 0.004502   | 2.3466 |
| LDAB          | 0.82262 | -0.28171 | 0.004502   | 2.3466 |
| L5PN          | 0.71071 | -0.49266 | 0.0047199  | 2.3261 |
| L5AB          | 0.70111 | -0.51229 | 0.00477    | 2.3215 |
| H1FC          | 0.7784  | -0.36142 | 0.0049486  | 2.3055 |
| LDFC          | 0.82459 | -0.27825 | 0.0053296  | 2.2733 |
| VLTG          | 0.74069 | -0.43306 | 0.0055825  | 2.2532 |
| L1CH          | 0.83058 | -0.26782 | 0.0064549  | 2.1901 |
| TPTG          | 0.77155 | -0.37418 | 0.0072214  | 2.1414 |

|               |         |          |           |        |
|---------------|---------|----------|-----------|--------|
| VLPL          | 0.79066 | -0.33887 | 0.0072214 | 2.1414 |
| L4PL          | 0.67186 | -0.57377 | 0.0078989 | 2.1024 |
| L6TG          | 0.82386 | -0.27952 | 0.02224   | 1.6529 |
| V1CH          | 0.76374 | -0.38884 | 0.023154  | 1.6354 |
| IDFC          | 0.75299 | -0.4093  | 0.023558  | 1.6279 |
| VLFC          | 0.83132 | -0.26653 | 0.023837  | 1.6227 |
| Succinic acid | 1.3282  | 0.4095   | 0.02705   | 1.5678 |
| Phenylalanine | 1.2187  | 0.28535  | 0.04194   | 1.3774 |

Multivariate Analysis: AHT vs. COVID-19 + AHT (S5)

PCA

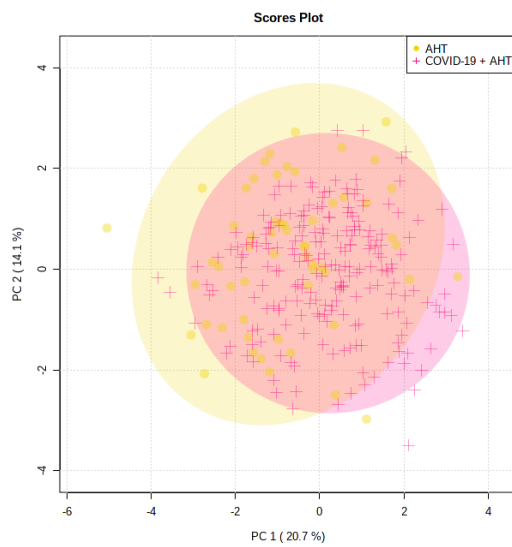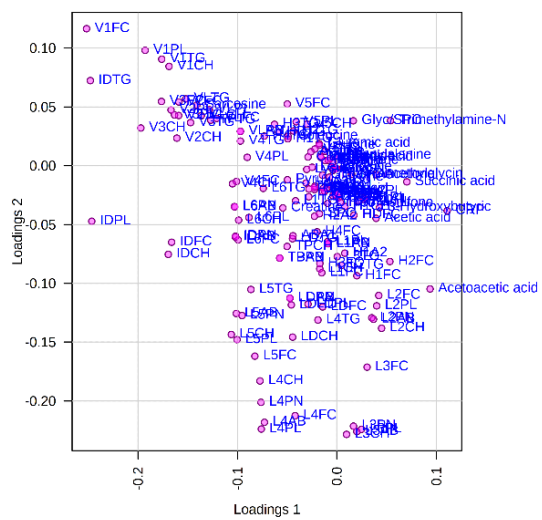

OPLS-DA

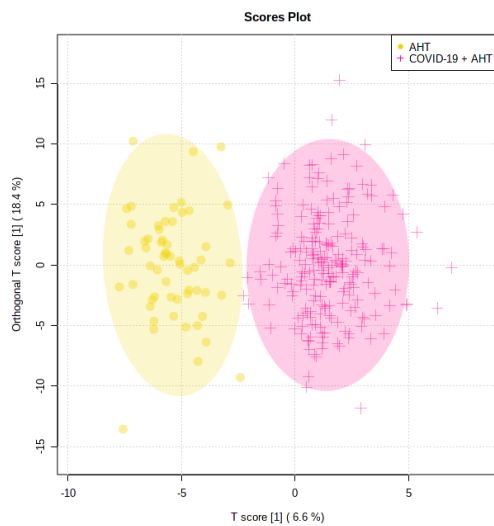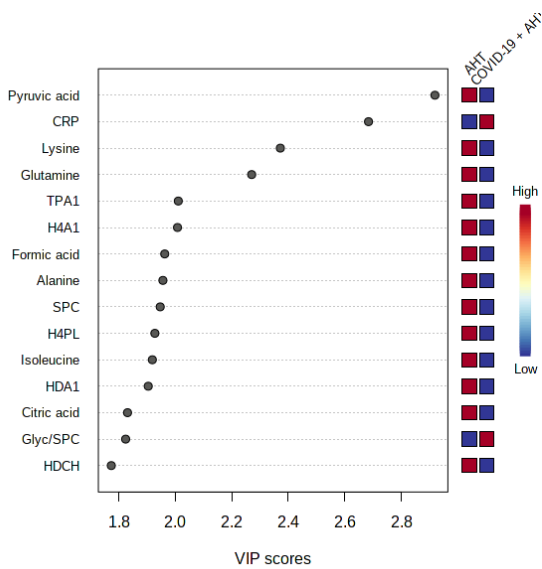



## Gender Analysis: COVID-19: Female vs. Male

Univariate Analysis (sorted by p-value) (S6 Table)

| Parameter         | FC      | log2(FC) | p.adjusted | -log10(p) |
|-------------------|---------|----------|------------|-----------|
| Kreatinin         | 1.4708  | 0.55657  | 1.37E-41   | 40.865    |
| Creatinine        | 1.4358  | 0.52186  | 1.28E-32   | 31.894    |
| Ferritin          | 3.1099  | 1.6369   | 3.05E-32   | 31.516    |
| GGT               | 2.162   | 1.1124   | 2.58E-21   | 20.589    |
| Harnstoff         | 1.452   | 0.53803  | 1.05E-19   | 18.977    |
| Leucine           | 1.297   | 0.37517  | 1.17E-17   | 16.932    |
| Valine            | 1.2048  | 0.26876  | 2.11E-16   | 15.676    |
| H1PL              | 0.72665 | -0.46066 | 1.25E-14   | 13.904    |
| H1CH              | 0.74276 | -0.42903 | 2.25E-12   | 11.648    |
| Glyc/SPC          | 1.2589  | 0.33212  | 6.51E-11   | 10.186    |
| H1FC              | 0.73985 | -0.4347  | 6.69E-11   | 10.174    |
| H2CH              | 0.82622 | -0.2754  | 9.13E-11   | 10.04     |
| Isoleucine        | 1.2821  | 0.35848  | 1.07E-10   | 9.9699    |
| H1A1              | 0.72677 | -0.46042 | 1.10E-10   | 9.9567    |
| L1CH              | 0.83057 | -0.26783 | 9.51E-10   | 9.0219    |
| H1A2              | 0.69659 | -0.52161 | 2.37E-09   | 8.626     |
| H3FC              | 0.8012  | -0.31977 | 3.44E-08   | 7.4636    |
| L3FC              | 0.8054  | -0.31222 | 3.24E-07   | 6.4889    |
| L3PL              | 0.79081 | -0.33859 | 8.15E-07   | 6.0886    |
| H2FC              | 0.82935 | -0.26994 | 1.36E-06   | 5.8654    |
| L2PL              | 0.83079 | -0.26744 | 2.17E-06   | 5.6642    |
| L3CH              | 0.77188 | -0.37355 | 2.71E-06   | 5.5678    |
| GOT               | 1.2546  | 0.32724  | 3.83E-06   | 5.4167    |
| Creatine          | 0.67374 | -0.56973 | 3.84E-06   | 5.4162    |
| L3AB              | 0.81767 | -0.29041 | 8.30E-06   | 5.081     |
| L3PN              | 0.81888 | -0.28827 | 9.59E-06   | 5.0181    |
| V2FC              | 1.2606  | 0.33411  | 1.20E-05   | 4.9222    |
| V1PL              | 1.2647  | 0.33877  | 1.56E-05   | 4.8081    |
| V1TG              | 1.2463  | 0.31765  | 1.70E-05   | 4.7708    |
| VLTG              | 1.2057  | 0.26991  | 2.66E-05   | 4.5754    |
| V3PL              | 1.2113  | 0.27653  | 5.03E-05   | 4.2984    |
| V2PL              | 1.2427  | 0.31349  | 6.74E-05   | 4.171     |
| L2CH              | 0.82693 | -0.27415 | 0.00010996 | 3.9588    |
| V2TG              | 1.237   | 0.30689  | 0.00022763 | 3.6428    |
| V1CH              | 1.2212  | 0.28826  | 0.00022763 | 3.6428    |
| V3FC              | 1.2045  | 0.26839  | 0.00024333 | 3.6138    |
| N-Dimethylglycine | 0.63067 | -0.66504 | 0.00026735 | 3.5729    |
| V1FC              | 1.2921  | 0.36972  | 0.00065077 | 3.1866    |
| H1TG              | 0.80807 | -0.30745 | 0.00075297 | 3.1232    |
| V2CH              | 1.2189  | 0.28563  | 0.0011719  | 2.9311    |
| Acetoacetic acid  | 1.8442  | 0.88301  | 0.0035446  | 2.4504    |
| IDTG              | 1.269   | 0.34366  | 0.0040801  | 2.3893    |
| Acetone           | 1.4223  | 0.50819  | 0.0046386  | 2.3336    |

|                       |        |         |           |        |
|-----------------------|--------|---------|-----------|--------|
| 3-Hydroxybutyric acid | 1.6625 | 0.73332 | 0.0059167 | 2.2279 |
| Succinic acid         | 1.4952 | 0.58032 | 0.0071047 | 2.1485 |

Multivariate Analysis: COVID-19: Male vs. Female (S7)

PCA

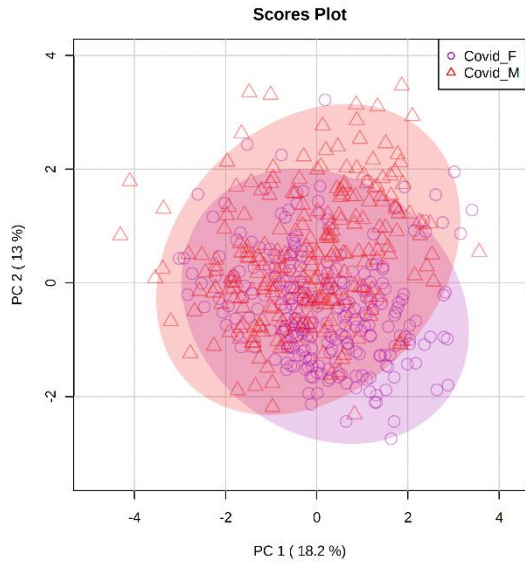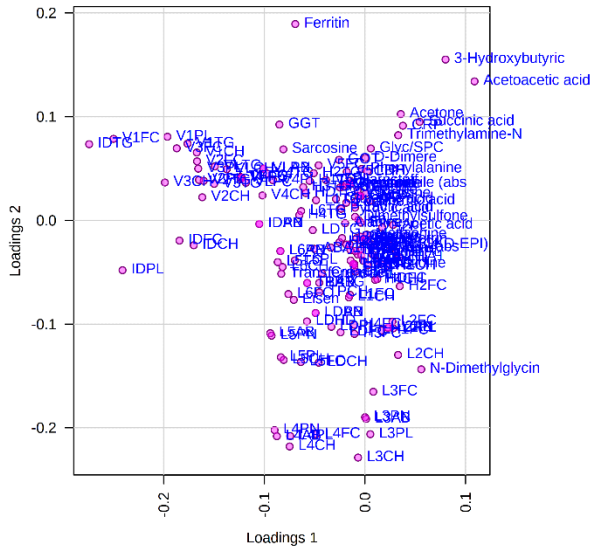

OPLS-DA

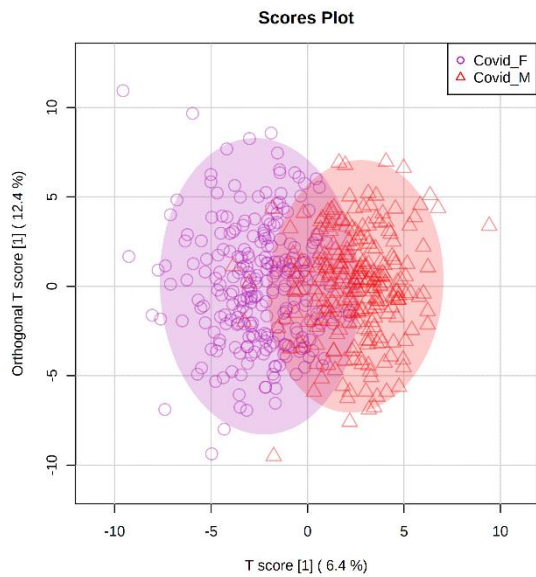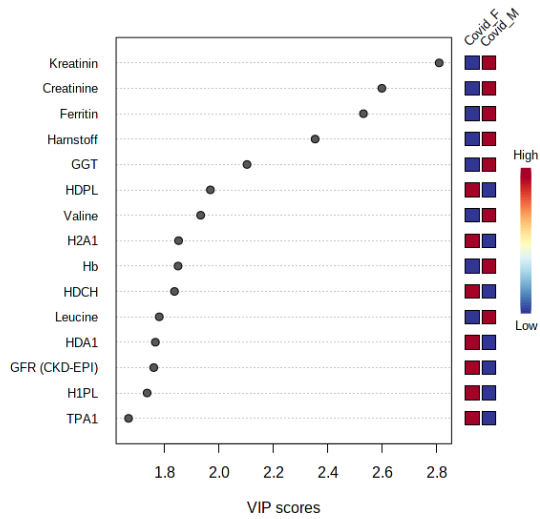

OPLS-DA (Creatinine, Kreatinin excluded)

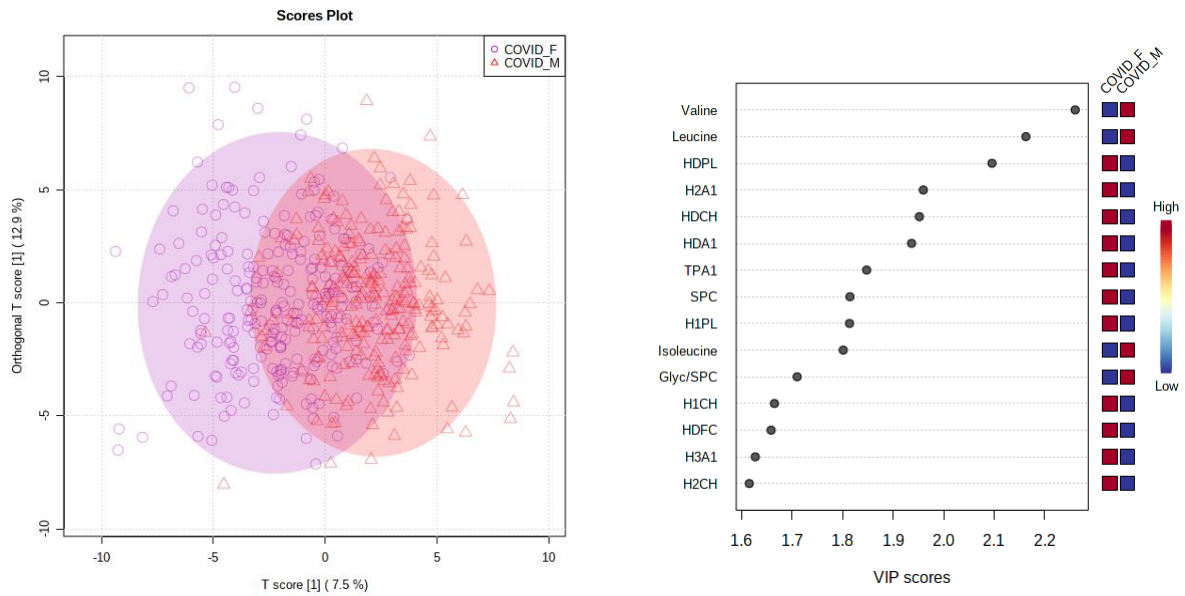

Analysis: COVID-19 + AHT: Female vs. Male

Univariate Analysis (sorted by p-value) (S8 Table)

| Parameter         | FC      | log2(FC) | p.adjusted | -log10(p) |
|-------------------|---------|----------|------------|-----------|
| Krea              | 1.606   | 0.68347  | 4.85E-15   | 14.314    |
| Creatinine        | 1.4297  | 0.51567  | 1.95E-11   | 10.711    |
| Leucine           | 1.3474  | 0.43012  | 1.23E-08   | 7.9091    |
| Urea              | 1.566   | 0.64708  | 2.61E-07   | 6.5835    |
| L1CH              | 0.80279 | -0.31691 | 4.66E-05   | 4.3312    |
| L1PL              | 0.81415 | -0.29664 | 4.70E-05   | 4.3276    |
| L1PN              | 0.82365 | -0.27989 | 6.58E-05   | 4.1821    |
| L1AB              | 0.82366 | -0.27988 | 6.58E-05   | 4.1821    |
| N-Dimethylglycine | 0.46741 | -1.0972  | 0.00019045 | 3.7202    |
| Citric acid       | 1.2752  | 0.35067  | 0.00022161 | 3.6544    |
| L1FC              | 0.81741 | -0.29087 | 0.00037996 | 3.4203    |
| L3CH              | 0.76204 | -0.39206 | 0.0006598  | 3.1806    |
| Isoleucine        | 1.2798  | 0.35595  | 0.00067522 | 3.1706    |
| L3AB              | 0.78239 | -0.35404 | 0.0038371  | 2.416     |
| L3PN              | 0.78511 | -0.34903 | 0.0039797  | 2.4002    |
| L4FC              | 0.7936  | -0.33351 | 0.004768   | 2.3217    |
| L3PL              | 0.77541 | -0.36697 | 0.0061644  | 2.2101    |
| L2PL              | 0.82578 | -0.27618 | 0.0061644  | 2.2101    |
| L2AB              | 0.83185 | -0.26561 | 0.0078533  | 2.1049    |
| L3FC              | 0.79968 | -0.3225  | 0.0096501  | 2.0155    |
| Creatine          | 0.55327 | -0.85395 | 0.012245   | 1.9121    |
| V2FC              | 1.2274  | 0.29558  | 0.014255   | 1.846     |
| V3PL              | 1.2118  | 0.27712  | 0.014255   | 1.846     |
| Dimethylsulfone   | 1.2904  | 0.3678   | 0.020641   | 1.6853    |
| V2PL              | 1.2261  | 0.29411  | 0.025487   | 1.5937    |



OPLS-DA (Creatinine, Kreatinin excluded)

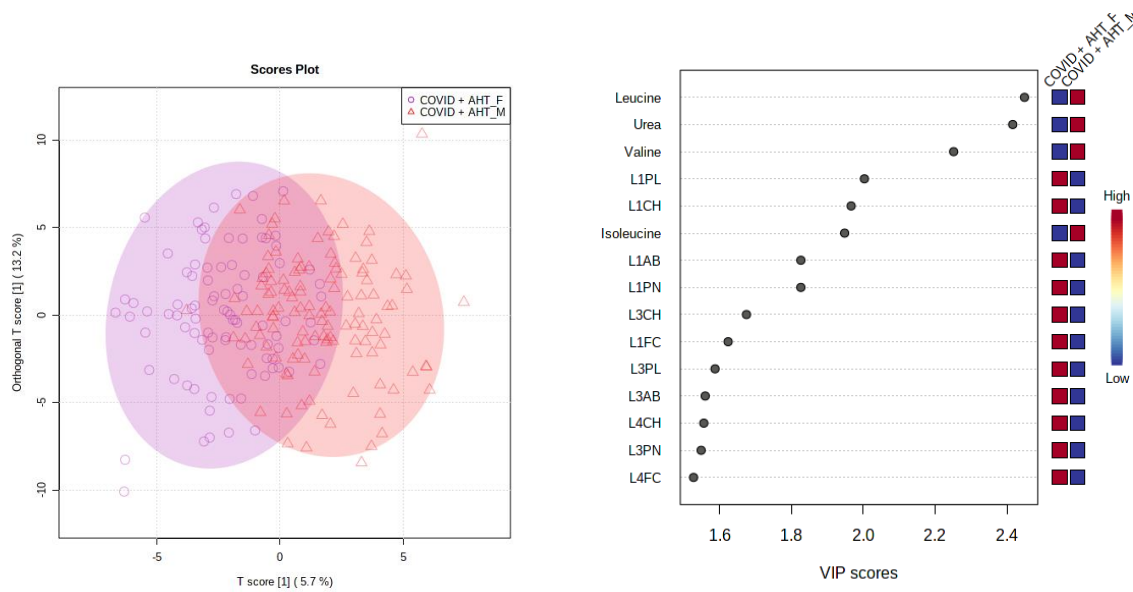

Analysis: Female: AHT vs. COVID-19 + AHT

Univariate Analysis (sorted by p-value) (S10 Table)

| Parameter    | FC      | log2(FC) | p.adjusted | -log10(p) |
|--------------|---------|----------|------------|-----------|
| Pyruvic acid | 0.34299 | -1.5437  | 5.63E-17   | 16.249    |
| CRP          | 4.3692  | 2.1274   | 6.47E-15   | 14.189    |
| Lysine       | 0.62592 | -0.67594 | 5.55E-14   | 13.255    |
| Citric acid  | 0.56397 | -0.82631 | 6.48E-11   | 10.189    |
| Glutamine    | 0.78078 | -0.35701 | 3.68E-08   | 7.4343    |
| SPC          | 0.73007 | -0.4539  | 5.42E-08   | 7.2658    |
| TPA1         | 0.78866 | -0.34253 | 5.42E-08   | 7.2658    |
| HDA1         | 0.79603 | -0.3291  | 2.46E-07   | 6.6098    |
| Leuk         | 0.67381 | -0.56958 | 4.86E-07   | 6.313     |
| Alanine      | 0.72843 | -0.45715 | 4.86E-07   | 6.313     |
| HDCH         | 0.76998 | -0.37711 | 9.45E-07   | 6.0246    |
| TPA2         | 0.80433 | -0.31414 | 2.76E-06   | 5.5595    |
| Isoleucine   | 0.64644 | -0.62942 | 5.11E-06   | 5.2915    |
| H4PL         | 0.76104 | -0.39395 | 5.11E-06   | 5.2915    |
| HDPL         | 0.80272 | -0.31703 | 5.11E-06   | 5.2915    |
| H4A1         | 0.77228 | -0.3728  | 5.52E-06   | 5.2578    |
| HDA2         | 0.82873 | -0.27102 | 1.11E-05   | 4.9558    |
| Glyc/SPC     | 1.4629  | 0.54881  | 1.22E-05   | 4.9128    |
| Formic acid  | 0.52923 | -0.91802 | 2.11E-05   | 4.6757    |
| H4CH         | 0.72215 | -0.46964 | 4.90E-05   | 4.3095    |
| H2A1         | 0.80784 | -0.30786 | 8.04E-05   | 4.0949    |
| Leucine      | 0.7479  | -0.41909 | 0.00014702 | 3.8326    |
| H3CH         | 0.8059  | -0.31133 | 0.0001662  | 3.7794    |
| H4A2         | 0.75402 | -0.40733 | 0.0001669  | 3.7775    |
| TPCH         | 0.81871 | -0.28858 | 0.00064526 | 3.1903    |
| H1CH         | 0.72735 | -0.45928 | 0.0008657  | 3.0626    |
| L6PL         | 0.78795 | -0.34382 | 0.00231    | 2.6364    |

|                       |         |          |           |        |
|-----------------------|---------|----------|-----------|--------|
| Dimethylsulfone       | 0.6156  | -0.69993 | 0.0025857 | 2.5874 |
| L6CH                  | 0.76671 | -0.38325 | 0.0027105 | 2.5669 |
| H1FC                  | 0.7069  | -0.50042 | 0.002792  | 2.5541 |
| L6FC                  | 0.74434 | -0.42597 | 0.0031034 | 2.5082 |
| H3FC                  | 0.72268 | -0.46857 | 0.0034169 | 2.4664 |
| IDPL                  | 0.64342 | -0.63616 | 0.0069898 | 2.1555 |
| Tyrosine              | 0.74021 | -0.43399 | 0.0076518 | 2.1162 |
| HDFC                  | 0.80722 | -0.30896 | 0.009037  | 2.044  |
| L6AB                  | 0.80154 | -0.31916 | 0.0093814 | 2.0277 |
| L6PN                  | 0.80159 | -0.31907 | 0.0093814 | 2.0277 |
| 3-Hydroxybutyric acid | 0.47148 | -1.0847  | 0.012008  | 1.9205 |
| H1PL                  | 0.77134 | -0.37456 | 0.012392  | 1.9068 |
| Glutamic acid         | 1.567   | 0.64805  | 0.014425  | 1.8409 |
| Sarcosine             | 0.64083 | -0.642   | 0.014882  | 1.8273 |
| L5CH                  | 0.74147 | -0.43155 | 0.019358  | 1.7131 |
| IDTG                  | 0.66494 | -0.5887  | 0.021925  | 1.6591 |
| H1A1                  | 0.76831 | -0.38024 | 0.027082  | 1.5673 |
| H4FC                  | 0.76722 | -0.38229 | 0.03287   | 1.4832 |
| L5PL                  | 0.78218 | -0.35443 | 0.039143  | 1.4073 |

Multivariate Analysis: AHT vs. COVID-19 + AHT: Female (S11)

PCA

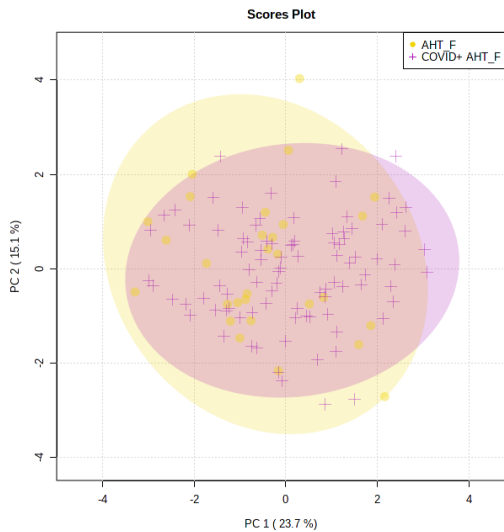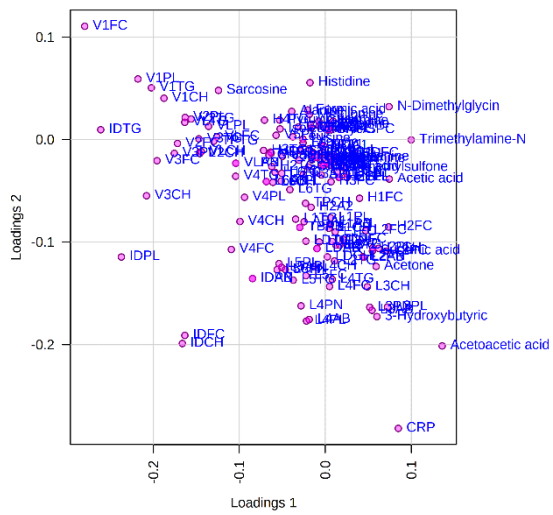

## OPLS-DA

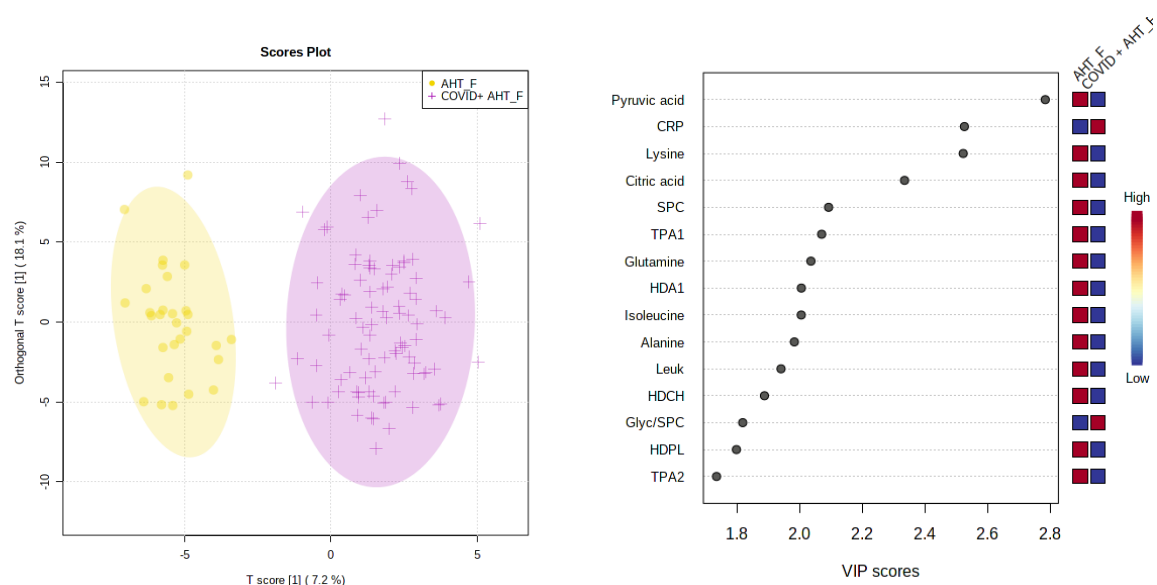

Analysis: Male: AHT vs. COVID-19 + AHT

Univariate Analysis (sorted by p-value) (S12 Table)

| Parameter    | FC      | log2(FC) | p.adjusted | -log10(p) |
|--------------|---------|----------|------------|-----------|
| Pyruvic acid | 0.34485 | -1.536   | 3.52E-19   | 18.454    |
| CRP          | 4.2723  | 2.095    | 1.57E-16   | 15.803    |
| Lysine       | 0.63734 | -0.64987 | 8.95E-11   | 10.048    |
| Glutamine    | 0.72924 | -0.45554 | 3.94E-09   | 8.4046    |
| H4A1         | 0.75654 | -0.40252 | 6.00E-08   | 7.2221    |
| H4PL         | 0.75084 | -0.41343 | 1.08E-07   | 6.9663    |
| Alanine      | 0.76222 | -0.39173 | 2.04E-07   | 6.6896    |
| H4A2         | 0.71879 | -0.47635 | 2.17E-07   | 6.6644    |
| Formic acid  | 0.4412  | -1.1805  | 2.77E-07   | 6.557     |
| Isoleucine   | 0.65948 | -0.6006  | 5.23E-06   | 5.2817    |
| TPCH         | 0.73219 | -0.44971 | 5.23E-06   | 5.2817    |
| Methionine   | 0.72368 | -0.46658 | 1.23E-05   | 4.9085    |
| H4CH         | 0.71043 | -0.49324 | 8.90E-05   | 4.0504    |
| Glyc/SPC     | 1.4649  | 0.55084  | 0.00012528 | 3.9021    |
| Leuk         | 0.71046 | -0.49318 | 0.00026453 | 3.5775    |
| SPC          | 0.81147 | -0.3014  | 0.0002678  | 3.5722    |
| L5CH         | 0.5579  | -0.84191 | 0.00060334 | 3.2194    |
| L6CH         | 0.6593  | -0.60099 | 0.00060334 | 3.2194    |
| IDPL         | 0.52262 | -0.93616 | 0.00073102 | 3.1361    |
| L2TG         | 1.284   | 0.36068  | 0.00083945 | 3.076     |
| L6PN         | 0.66376 | -0.59128 | 0.0011325  | 2.946     |
| L6AB         | 0.66839 | -0.58125 | 0.0013503  | 2.8696    |
| L5AB         | 0.5913  | -0.75803 | 0.0013572  | 2.8674    |
| L5PN         | 0.61138 | -0.70985 | 0.0015575  | 2.8076    |
| L5PL         | 0.59748 | -0.74303 | 0.0016275  | 2.7885    |

|               |         |          |           |        |
|---------------|---------|----------|-----------|--------|
| L6PL          | 0.67226 | -0.5729  | 0.0016275 | 2.7885 |
| Leucine       | 0.79928 | -0.32324 | 0.0016275 | 2.7885 |
| V1FC          | 0.54109 | -0.88605 | 0.0023185 | 2.6348 |
| LDPL          | 0.74792 | -0.41905 | 0.0023185 | 2.6348 |
| Histidine     | 0.71859 | -0.47676 | 0.0026369 | 2.5789 |
| TPAB          | 0.78371 | -0.35161 | 0.0026369 | 2.5789 |
| TBPN          | 0.78371 | -0.35161 | 0.0026369 | 2.5789 |
| L6FC          | 0.64845 | -0.62494 | 0.0034598 | 2.4609 |
| Citric acid   | 0.80975 | -0.30445 | 0.0037056 | 2.4311 |
| V1TG          | 0.61227 | -0.70777 | 0.0038169 | 2.4183 |
| Glutamic acid | 1.4374  | 0.5235   | 0.0038772 | 2.4115 |
| LDCH          | 0.69071 | -0.53385 | 0.0042782 | 2.3687 |
| LDPN          | 0.75427 | -0.40685 | 0.0042782 | 2.3687 |
| LDAB          | 0.75427 | -0.40685 | 0.0042782 | 2.3687 |
| V1PL          | 0.58875 | -0.76427 | 0.0047406 | 2.3242 |
| L4AB          | 0.60458 | -0.72599 | 0.0047406 | 2.3242 |
| L5FC          | 0.6296  | -0.66749 | 0.0047406 | 2.3242 |
| VLPL          | 0.72496 | -0.46403 | 0.0050067 | 2.3004 |
| L4CH          | 0.56466 | -0.82454 | 0.0055891 | 2.2527 |
| L4PN          | 0.61193 | -0.70856 | 0.0055891 | 2.2527 |
| IDFC          | 0.66339 | -0.59207 | 0.0055891 | 2.2527 |
| VLTG          | 0.67483 | -0.5674  | 0.0099364 | 2.0028 |
| L1CH          | 0.781   | -0.35661 | 0.010783  | 1.9673 |
| H2TG          | 1.2388  | 0.30893  | 0.011086  | 1.9552 |
| IDTG          | 0.51742 | -0.95058 | 0.011198  | 1.9509 |
| V1CH          | 0.65974 | -0.60003 | 0.011198  | 1.9509 |
| L4FC          | 0.64492 | -0.6328  | 0.011887  | 1.9249 |
| Sarcosine     | 0.56744 | -0.81747 | 0.012715  | 1.8957 |
| Tyrosine      | 0.82192 | -0.28293 | 0.013507  | 1.8694 |
| IDCH          | 0.66296 | -0.593   | 0.015684  | 1.8046 |
| VLFC          | 0.76758 | -0.38161 | 0.015684  | 1.8046 |
| H4FC          | 0.76955 | -0.37791 | 0.015684  | 1.8046 |
| LDFC          | 0.77818 | -0.36183 | 0.015684  | 1.8046 |
| L4PL          | 0.59681 | -0.74465 | 0.017443  | 1.7584 |
| TPTG          | 0.70496 | -0.50438 | 0.017822  | 1.749  |
| Succinic acid | 2.7587  | 1.464    | 0.018408  | 1.735  |
| L1FC          | 0.80636 | -0.31051 | 0.024057  | 1.6188 |
| Krea          | 1.3017  | 0.38036  | 0.026281  | 1.5804 |
| Lactic acid   | 1.2756  | 0.35117  | 0.026326  | 1.5796 |
| H4TG          | 0.81799 | -0.28984 | 0.049361  | 1.3066 |



### Multivariate Analysis: AHT vs. COVID-19 + AHT: Male (S13)

#### PCA

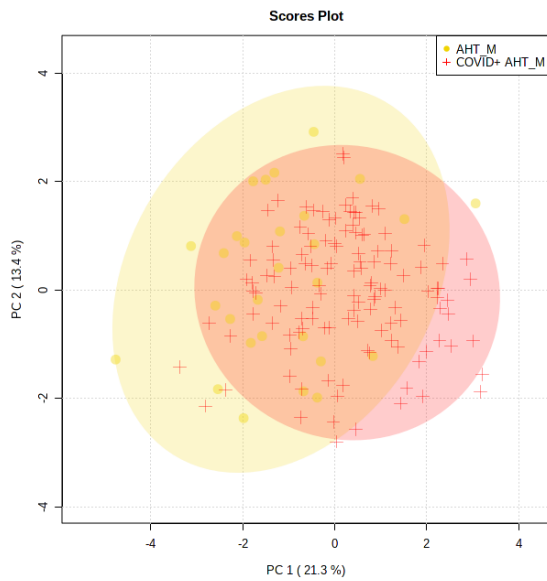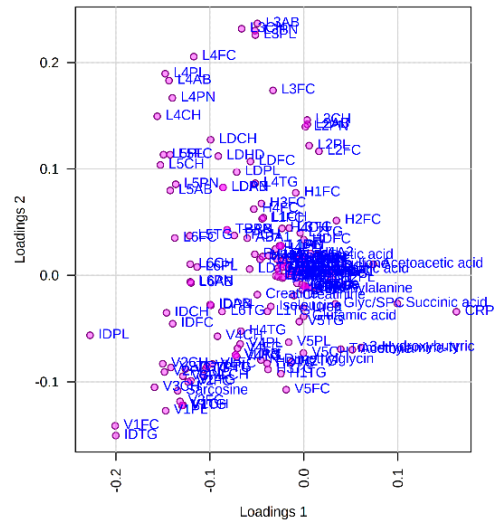

#### OPLS-DA

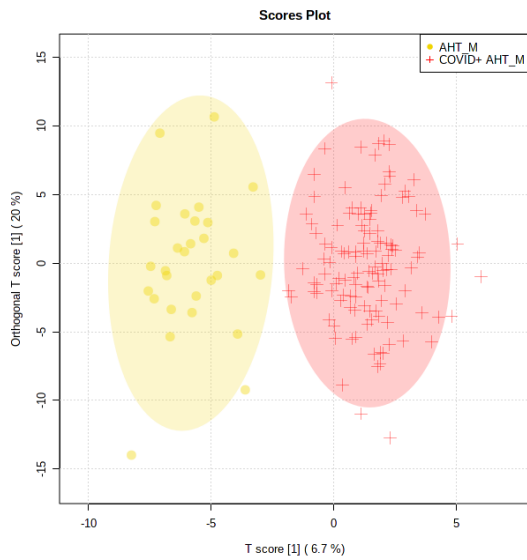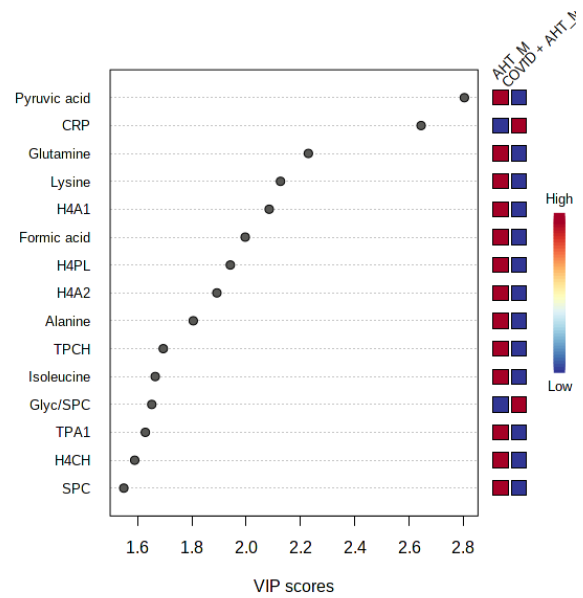

### Analysis: COVID-19: AHT vs. regular BP

#### Univariate Analysis (sorted by p-value) (S14 Table)

| Parameter  | FC     | log2(FC) | p.adjusted | -log10(p) |
|------------|--------|----------|------------|-----------|
| Urea       | 1.3859 | 0.47079  | 2.31E-10   | 9.6361    |
| Creatinine | 1.2227 | 0.29007  | 8.97E-08   | 7.0474    |
| Krea       | 1.2426 | 0.31336  | 8.93E-07   | 6.0489    |
| TPTG       | 1.2247 | 0.29246  | 9.98E-05   | 4.0008    |
| L3PL       | 0.818  | -0.28982 | 0.00013043 | 3.8846    |



## OPLS-DA

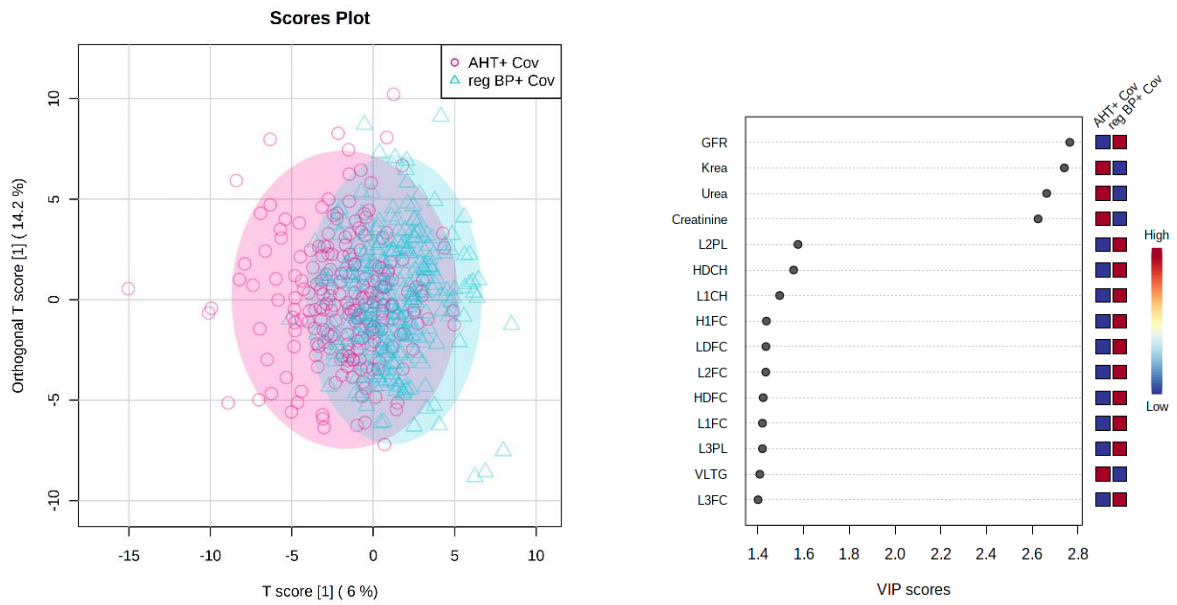

Analysis: Hospitalized COVID-19 patients: AHT vs. regular BP

Univariate Analysis (sorted by p-value) (S16 Table)

| Parameter  | FC      | log2(FC) | p.adjusted | -log10(p) |
|------------|---------|----------|------------|-----------|
| Krea       | 1.5054  | 0.59016  | 0.00047905 | 3.3196    |
| Creatinine | 1.3493  | 0.43221  | 0.00047905 | 3.3196    |
| Urea       | 1.6369  | 0.71095  | 0.0082981  | 2.081     |
| Creatine   | 0.49471 | -1.0153  | 0.012673   | 1.8971    |
| V1CH       | 1.478   | 0.5636   | 0.012673   | 1.8971    |
| V1TG       | 1.4507  | 0.5368   | 0.012673   | 1.8971    |
| H2TG       | 1.263   | 0.33684  | 0.012673   | 1.8971    |
| HDTG       | 1.2326  | 0.30176  | 0.012673   | 1.8971    |
| H3TG       | 1.2303  | 0.29896  | 0.012673   | 1.8971    |
| V2FC       | 1.4265  | 0.51248  | 0.020486   | 1.6885    |
| VLTG       | 1.3405  | 0.42273  | 0.020486   | 1.6885    |
| TPTG       | 1.3085  | 0.3879   | 0.020486   | 1.6885    |
| H1TG       | 1.2993  | 0.3777   | 0.020486   | 1.6885    |
| VLAB       | 1.2303  | 0.29905  | 0.020486   | 1.6885    |
| VLPN       | 1.2303  | 0.299    | 0.020486   | 1.6885    |
| V1PL       | 1.4318  | 0.51783  | 0.023103   | 1.6363    |
| V3FC       | 1.4485  | 0.53451  | 0.029656   | 1.5279    |
| IDTG       | 1.6412  | 0.71478  | 0.04039    | 1.3937    |

Multivariate Analysis: Hospitalized COVID-19 patients: AHT vs. regular BP (S17)

PCA

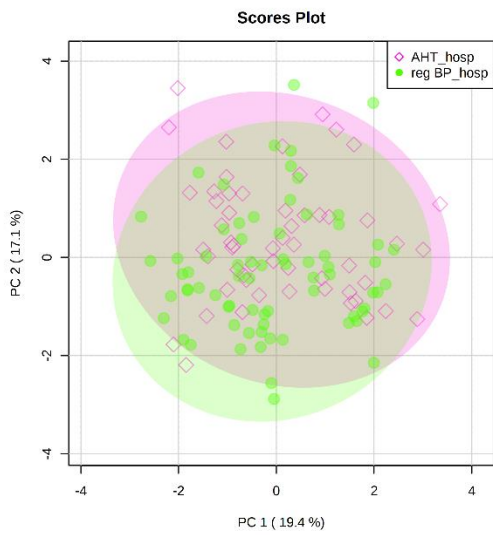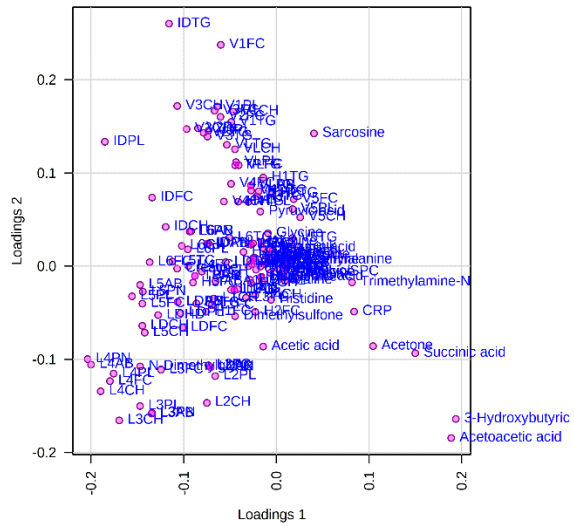

OPLS-DA

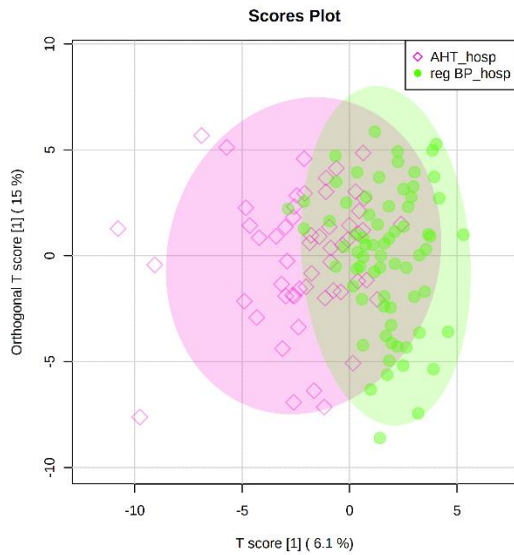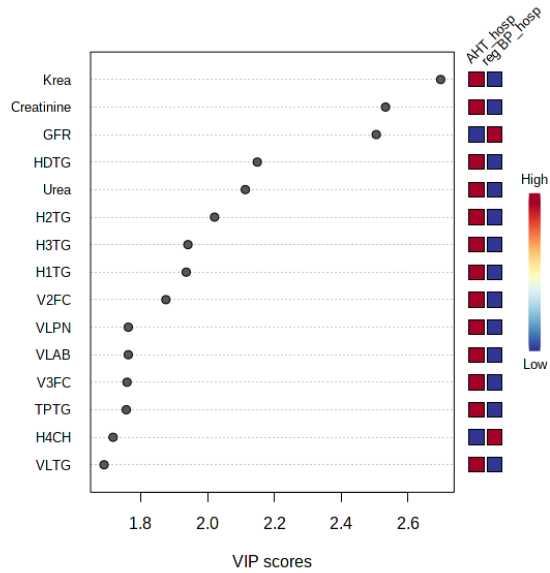

Analysis: COVID-19 + AHT: RAASI vs. noRAASI

Univariate Analysis (sorted by p-value) (S18 Table)

| Parameter    | FC      | log2(FC) | p.adjusted | -log10(p) |
|--------------|---------|----------|------------|-----------|
| Creatinine   | 1.4132  | 0.499    | 0.012372   | 1.9075    |
| GFR          | 0.82702 | -0.27401 | 0.012372   | 1.9075    |
| Pyruvic acid | 1.3973  | 0.48267  | 0.014568   | 1.8366    |

|      |        |         |          |        |
|------|--------|---------|----------|--------|
| V4TG | 1.4137 | 0.49952 | 0.019904 | 1.7011 |
| V4PL | 1.3766 | 0.46108 | 0.022486 | 1.6481 |
| VLPN | 1.3316 | 0.41317 | 0.026222 | 1.5813 |
| VLAB | 1.3315 | 0.41309 | 0.026222 | 1.5813 |
| Krea | 1.5653 | 0.64644 | 0.026385 | 1.5786 |
| V4CH | 1.435  | 0.52105 | 0.039837 | 1.3997 |

Multivariate Analysis: COVID-19 + AHT: RAASI vs. noRAASI (S19)

PCA

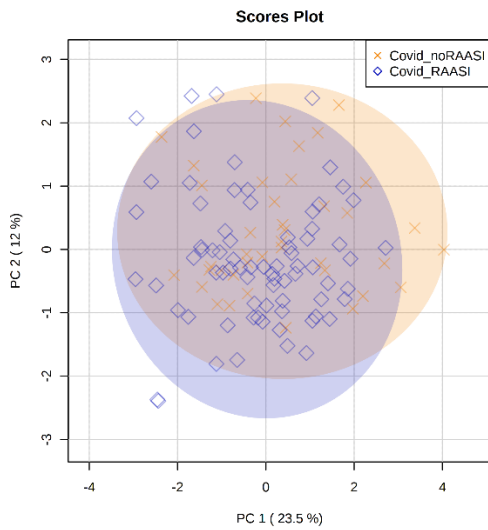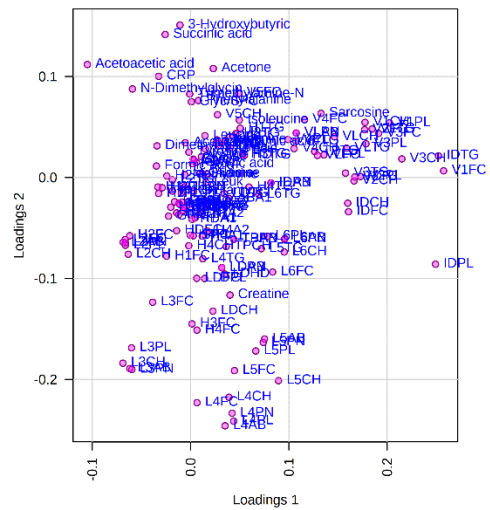

OPLS-DA

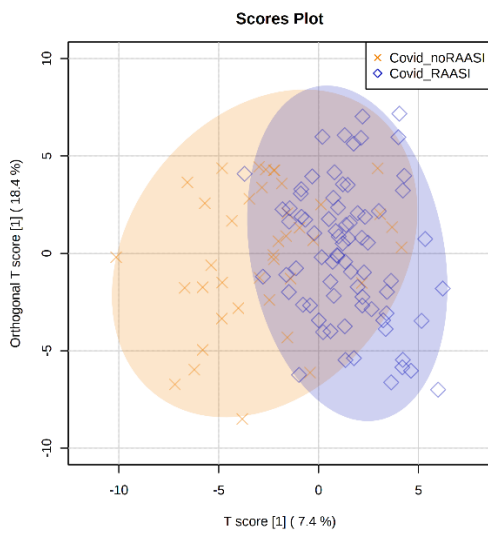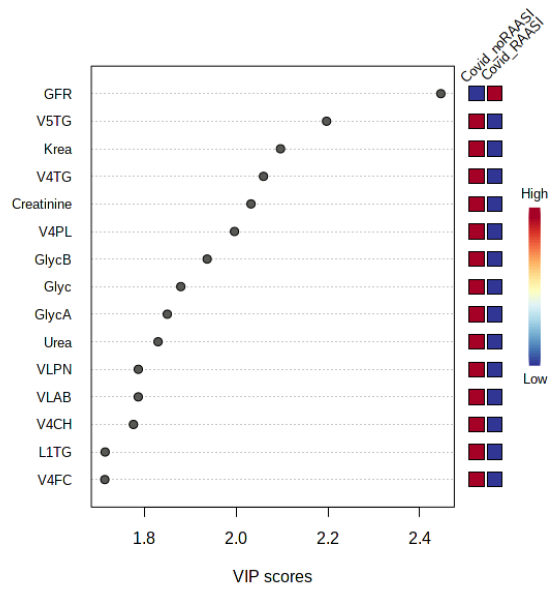

Violin plots and unpaired t-tests, showing typical altered metabolites and lipoproteins in COVID-19 patients (S20)

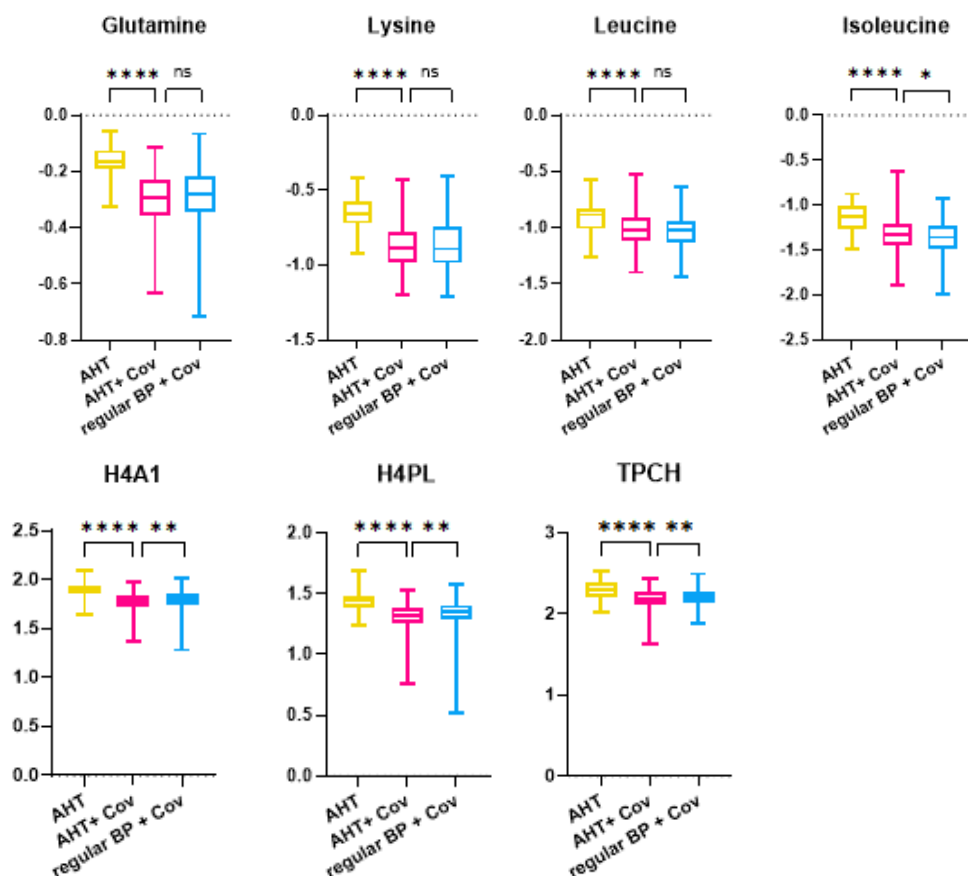

Abbreviations (S21 Table)

| Name  | Extended name                                              |
|-------|------------------------------------------------------------|
| ACEI  | Angiotensin- converting- enzyme inhibitor                  |
| AHT   | Arterial hypertension                                      |
| AT1RB | Angiotensin-1 receptor blockers                            |
| AUC   | Area under the curve                                       |
| BB    | Beta blockers                                              |
| BCAA  | Branched chained amino acids (leucine, isoleucine, valine) |
| BP    | Blood pressure                                             |
| CCB   | Calcium channel blockers                                   |
| FC    | Fold change                                                |
| FDR   | False Discovery rate                                       |
| HC    | Healthy cohort                                             |
| NMR   | Nuclear magnetic resonance                                 |
| T2DM  | Diabetes mellitus Type 2                                   |
| PACS  | Post-acute-covid- syndrom                                  |
| PCA   | Principal component analysis                               |
| RAASI | Renin-angiotensin-aldosterone- system inhibitors           |

| Name           | Extended name                         | Unit                     |
|----------------|---------------------------------------|--------------------------|
| BUN            | Blood urea nitrogen                   | mg/dL                    |
| Creatinine.lab | Creatinine (laboratory report)        | mg/dL                    |
| CRP            | C- reactive protein                   | mg/L                     |
| GFR            | Glomerular filtration rate            | ml/min                   |
| GGT            | Gamma-glutamyl transferase            | Unit/L                   |
| Glyc           | Glycoproteins                         | Procedure defined Unit   |
| GOT            | Glutamate- oxalacetate- transferase   | Unit/L                   |
| Leuk           | Leucozytes                            | x10 <sup>9</sup> cells/L |
| LDH            | Lactat dehydrogenase                  | Unit/L                   |
| SPC            | Supramolecular phospholipid composite | Procedure defined Unit   |
| TMAO           | Trimethylamine-N-oxide                | mmol/L                   |

| Name | Extended name                          | Unit  |
|------|----------------------------------------|-------|
| ABA1 | Apolipoprotein- B100/Apolipoprotein-A1 | none  |
| H1A1 | Apolipoprotein- A1 HDL-1               | mg/dL |
| H1A2 | Apolipoprotein- A2 HDL-1               | mg/dL |
| H1CH | Cholesterol HDL-1                      | mg/dL |
| H1FC | Free Cholesterol HDL-1                 | mg/dL |
| H1PL | Phospholipids HDL-1                    | mg/dL |
| H1TG | Triglycerides HDL-1                    | mg/dL |
| H2A1 | Apolipoprotein- A1 HDL-2               | mg/dL |
| H2A2 | Apolipoprotein- A2 HDL-2               | mg/dL |
| H2CH | Cholesterol HDL-2                      | mg/dL |
| H2FC | Free Cholesterol HDL-2                 | mg/dL |
| H2PL | Phospholipids HDL-2                    | mg/dL |
| H2TG | Triglycerides HDL-2                    | mg/dL |
| H3A1 | Apolipoprotein- A1 HDL-3               | mg/dL |
| H3A2 | Apolipoprotein- A2 HDL-3               | mg/dL |
| H3CH | Cholesterol HDL-3                      | mg/dL |
| H3FC | Free Cholesterol HDL-3                 | mg/dL |
| H3PL | Phospholipids HDL-3                    | mg/dL |
| H3TG | Triglycerides HDL-3                    | mg/dL |
| H4A1 | Apolipoprotein- A1 HDL-4               | mg/dL |
| H4A2 | Apolipoprotein- A2 HDL-4               | mg/dL |
| H4CH | Cholesterol HDL-4                      | mg/dL |
| H4FC | Free Cholesterol HDL-4                 | mg/dL |
| H4PL | Phospholipids HDL-4                    | mg/dL |
| H4TG | Triglycerides HDL-4                    | mg/dL |
| HDA1 | HDL-Apolipoprotein-A1                  | mg/dL |
| HDA2 | HDL-Apolipoprotein-A2                  | mg/dL |
| HDCH | HDL-Cholesterol                        | mg/dL |
| HDFC | HDL Free Cholesterol                   | mg/dL |
| HDPL | HDL Phospholipids                      | mg/dL |
| HDTG | HDL Triglycerides                      | mg/dL |
| IDAB | IDL-Apolipoprotein-B100                | mg/dL |
| IDCH | IDL Cholesterol                        | mg/dL |
| IDFC | IDL Free Cholesterol                   | mg/dL |
| IDPL | IDL Phospholipids                      | mg/dL |
| IDPN | IDL Particle Numer                     | mg/dL |

|      |                                                               |       |
|------|---------------------------------------------------------------|-------|
| IDTG | IDL Triglycerides                                             | mg/dL |
| L1AB | Apolipoprotein-B100 LDL-1                                     | mg/dL |
| L1CH | Cholesterol LDL-1                                             | mg/dL |
| L1FC | Free Cholesterol LDL-1                                        | mg/dL |
| L1PL | Phospholipids LDL-1                                           | mg/dL |
| L1PN | Particle Number LDL-1                                         | mg/dL |
| L1TG | Triglycerides LDL-1                                           | mg/dL |
| L2AB | Apolipoprotein-B100 LDL-2                                     | mg/dL |
| L2CH | Cholesterol LDL-2                                             | mg/dL |
| L2FC | Free Cholesterol LDL-2                                        | mg/dL |
| L2PL | Phospholipids LDL-2                                           | mg/dL |
| L2PN | Particle Number LDL-2                                         | mg/dL |
| L2TG | Triglycerides LDL-2                                           | mg/dL |
| L3AB | Apolipoprotein-B100 LDL-3                                     | mg/dL |
| L3CH | Cholesterol LDL-3                                             | mg/dL |
| L3FC | Free Cholesterol LDL-3                                        | mg/dL |
| L3PL | Phospholipids LDL-3                                           | mg/dL |
| L3PN | Particle Number LDL-3                                         | mg/dL |
| L3TG | Triglycerides LDL-3                                           | mg/dL |
| L4AB | Apolipoprotein-B100 LDL-4                                     | mg/dL |
| L4CH | Cholesterol LDL-4                                             | mg/dL |
| L4FC | Free Cholesterol LDL-4                                        | mg/dL |
| L4PL | Phospholipids LDL-4                                           | mg/dL |
| L4PN | Particle Number LDL-4                                         | mg/dL |
| L4TG | Triglycerides LDL-4                                           | mg/dL |
| L5AB | Apolipoprotein-B100 LDL-5                                     | mg/dL |
| L5CH | Cholesterol LDL-5                                             | mg/dL |
| L5FC | Free Cholesterol LDL-5                                        | mg/dL |
| L5PL | Phospholipids LDL-5                                           | mg/dL |
| L5PN | Particle Number LDL-5                                         | mg/dL |
| L5TG | Triglycerides LDL-5                                           | mg/dL |
| L6AB | Apolipoprotein-B100 LDL-6                                     | mg/dL |
| L6CH | Cholesterol LDL-6                                             | mg/dL |
| L6FC | Free Cholesterol LDL-6                                        | mg/dL |
| L6PL | Phospholipids LDL-6                                           | mg/dL |
| L6PN | Particle Number LDL-6                                         | mg/dL |
| L6TG | Triglycerides LDL-6                                           | mg/dL |
| LDAB | LDL- Apolipoprotein-B100                                      | mg/dL |
| LDCH | LDL Cholesterol                                               | mg/dL |
| LDFC | LDL Free Cholesterol                                          | mg/dL |
| LDHD | LDL Cholesterol/HDL-Cholesterol                               | mg/dL |
| LDPL | LDL Phospholipids                                             | mg/dL |
| LDPN | LDL Particle Number                                           | mg/dL |
| LDTG | LDL Triglycerides                                             | mg/dL |
| TBPN | Total Particle Numer (apolipoprotein-B100 carrying particles) | mg/dL |
| TPA1 | Total Plasma Apolipoprotein-A1                                | mg/dL |
| TPA2 | Total Plasma Apolipoprotein-A2                                | mg/dL |
| TPAB | Total Plasma Apolipoprotein-B100                              | mg/dL |
| TPCH | Total Plasma Cholesterol                                      | mg/dL |
| TPTG | Total Plasma Triglycerides                                    | mg/dL |



|      |                          |       |
|------|--------------------------|-------|
| V1CH | Cholesterol VLDL-1       | mg/dL |
| V1FC | Free Cholesterol VLDL-1  | mg/dL |
| V1PL | Phospholipids VLDL-1     | mg/dL |
| V1TG | Triglycerides VLDL-1     | mg/dL |
| V2CH | Cholesterol VLDL-2       | mg/dL |
| V2FC | Free Cholesterol VLDL-2  | mg/dL |
| V2PL | Phospholipids VLDL-2     | mg/dL |
| V2TG | Triglycerides VLDL-2     | mg/dL |
| V3CH | Cholesterol VLDL-3       | mg/dL |
| V3FC | Free Cholesterol VLDL-3  | mg/dL |
| V3PL | Phospholipids VLDL-3     | mg/dL |
| V3TG | Triglycerides VLDL-3     | mg/dL |
| V4CH | Cholesterol VLDL-4       | mg/dL |
| V4FC | Free Cholesterol VLDL-4  | mg/dL |
| V4PL | Phospholipids VLDL-4     | mg/dL |
| V4TG | Triglycerides VLDL-4     | mg/dL |
| V5CH | Cholesterol VLDL-5       | mg/dL |
| V5FC | Free Cholesterol VLDL-5  | mg/dL |
| V5PL | Phospholipids VLDL-5     | mg/dL |
| V5TG | Triglycerides VLDL-5     | mg/dL |
| VLAB | VLDL-Apolipoprotein-B100 | mg/dL |
| VLCH | VLDL Cholesterol         | mg/dL |
| VLFC | VLDL Free Cholesterol    | mg/dL |
| VLPL | VLDL Phospholipids       | mg/dL |
| VLPN | VLDL Particle Number     | mg/dL |
| VLTG | VLDL Triglycerides       | mg/dL |
